# Supplementary material for: Human embryonic stem cell lines derived from single blastomeres of two 4-cell stage embryos
Source: PubMed Central journal article supplement — Hum Reprod. 2009 Jul 24;24(11):2709–17. doi: 10.1093/humrep/dep262 (PMC2763129; doi:10.1093/humrep/dep262), 2009-07-24

## Supplementary figure 1:

Results of the array-based comparative genomic hybridization for VUB27\_PATRU. The graphs presenting the array-CGH results show the plotting of the  $\log_2$  of the Cy5 to Cy3 ratio. For instance: samples labelled in Cy5 containing a duplication as compared to the control sample in Cy3 will present the duplicated clones as showing a positive value of the  $\log_2$  of the Cy5/Cy3 ratio. The male control sample was labelled in Cy5, the test sample in Cy3. The results show a normal 46, XX karyotype. All clones duplicated or deleted are polymorphic.

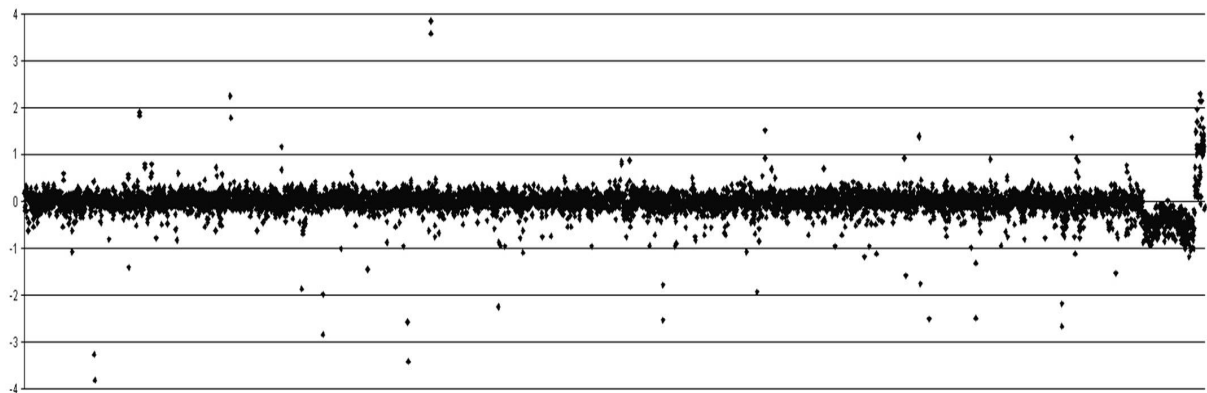

Supplement: dep262_1.pdf [file dep262_1.pdf]
